## RESEARCH ARTICLE

# *Hox11* genes are required for regional patterning and integration of muscle, tendon and bone

Ilea T. Swinehart<sup>1</sup>, Aleesa J. Schlientz<sup>2</sup>, Christopher A. Quintanilla<sup>2</sup>, Douglas P. Mortlock<sup>3</sup> and Deneen M. Wellik<sup>2,\*</sup>**ABSTRACT**

Development of the musculoskeletal system requires precise integration of muscles, tendons and bones. The molecular mechanisms involved in the differentiation of each of these tissues have been the focus of significant research; however, much less is known about how these tissues are integrated into a functional unit appropriate for each body position and role. Previous reports have demonstrated crucial roles for Hox genes in patterning the axial and limb skeleton. Loss of *Hox11* paralogous gene function results in dramatic malformation of limb zeugopod skeletal elements, the radius/ulna and tibia/fibula, as well as transformation of the sacral region to a lumbar phenotype. Utilizing a *Hoxa11eGFP* knock-in allele, we show that *Hox11* genes are expressed in the connective tissue fibroblasts of the outer perichondrium, tendons and muscle connective tissue of the zeugopod region throughout all stages of development. *Hox11* genes are not expressed in differentiated cartilage or bone, or in vascular or muscle cells in these regions. Loss of *Hox11* genes disrupts regional muscle and tendon patterning of the limb in addition to affecting skeletal patterning. The tendon and muscle defects in *Hox11* mutants are independent of skeletal patterning events as disruption of tendon and muscle patterning is observed in *Hox11* compound mutants that do not have a skeletal phenotype. Thus, Hox genes are not simply regulators of skeletal morphology as previously thought, but are key factors that regulate regional patterning and integration of the musculoskeletal system.

**KEY WORDS:** Hox genes, Limb development, Stromal cells, Musculoskeletal integration, Connective tissue, Mouse

**INTRODUCTION**

The vertebrate limb provides a powerful system for the study of tissue patterning and morphogenesis. The vertebrate limb musculoskeletal system is a highly complex structure with >40 distinct muscles connected through tendons to skeletal elements. The morphology of each individual muscle and bone is designed to perform a specific function in order to generate a large range of movement and fine motor control of the limb. These tissues must be precisely patterned and integrated during development to perform properly. Considerable knowledge has been accumulated regarding the molecular pathways involved in the differentiation of each of the tissue types: muscle, tendon and bone (Buckingham et al., 2003;

Karsenty et al., 2009; Tozer and Duprez, 2005). However, much less is known about how the tissues are properly integrated with one another to produce functional units for locomotion.

Hox genes have been long appreciated to provide important patterning cues along the anterior-posterior axis of the vertebral skeleton and the proximal-distal axis of the limb skeleton (Izpisua-Belmonte and Duboule, 1992; Mallo et al., 2010; Wellik, 2007). There is a high degree of sequence similarity and functional redundancy between members within a Hox paralogous group (Mallo et al., 2009; Wellik, 2007). Loss of function of Abdominal-B class Hox genes from paralogous groups 9–13 results in disrupted patterning of limb skeletal elements within specific proximal-distal regions whereas other regions of the limb are largely unaffected. *Hox9* and *Hox10* paralogous genes pattern the stylopod skeleton (femur or humerus) (Fromental-Ramain et al., 1996a; Wellik and Capecchi, 2003), *Hox11* genes function in the zeugopod (radius/ulna, tibia/fibula) (Boulet and Capecchi, 2004; Davis et al., 1995; Wellik and Capecchi, 2003) and *Hox13* genes are required for autopod development (Fromental-Ramain et al., 1996b). During limb morphogenesis, dynamic expression patterns are observed for Hox genes. They are first expressed broadly in the distal mesenchyme of the early limb bud and later become restricted along the proximal-distal axis to the regions they pattern, with *Hox9* and *Hox10* genes most proximal and *Hox13* genes most distal (Izpisua-Belmonte and Duboule, 1992; Nelson et al., 2008; Zakany and Duboule, 2007).

Using a *Hoxa11eGFP* knock-in/loss-of-function allele to visualize *Hox11* gene expression and inform possible mechanisms of Hox patterning of limb skeletal elements, we found the surprising result that *Hox11* gene expression is largely excluded from condensing cartilage from the earliest stages. *Hox11* genes are expressed strongly in the outer perichondrial layer of the developing zeugopod, throughout the tendons, and also in the muscle connective tissue of the forelimb zeugopod. In the absence of *Hoxa11* and *Hoxd11*, muscle and tendon patterning in the forelimb zeugopod is severely disrupted, in addition to the previously reported skeletal defects, whereas musculoskeletal patterning in the stylopod and autopod region is largely unaffected. In *Hox11* mutants, numerous muscles and tendons are absent and others fail to separate into properly patterned muscle bundles. In compound mutants with a single wild-type allele of either *Hoxa11* or *Hoxd11*, the limb skeleton develops normally through embryonic stages; however, muscle and tendon patterning is disrupted, demonstrating that the tendon and muscle patterning defects are not secondary to perturbation of skeletal morphology. Our finding shifts the paradigm of Hox function in musculoskeletal patterning from one in which Hox genes are crucial skeletal patterning factors to one that recognizes their key role in the patterning and integration of all three tissue types of the musculoskeletal system; the bone, tendon and muscle. The expression of *Hox11* genes in the zeugopod suggests that Hox genes function regionally in connective tissues to control these events during development.

<sup>1</sup>Program in Cell and Molecular Biology, University of Michigan, Ann Arbor, MI 48109-2200, USA. <sup>2</sup>Department of Internal Medicine, Division of Molecular Medicine and Genetics, University of Michigan, Ann Arbor, MI 48109-2200, USA. <sup>3</sup>Department of Molecular Physiology and Biophysics, Center for Human Genetics Research, Vanderbilt University School of Medicine, Nashville, TN 37232, USA.

\*Author for correspondence (dwellik@umich.edu)

Received 20 March 2013; Accepted 22 August 2013

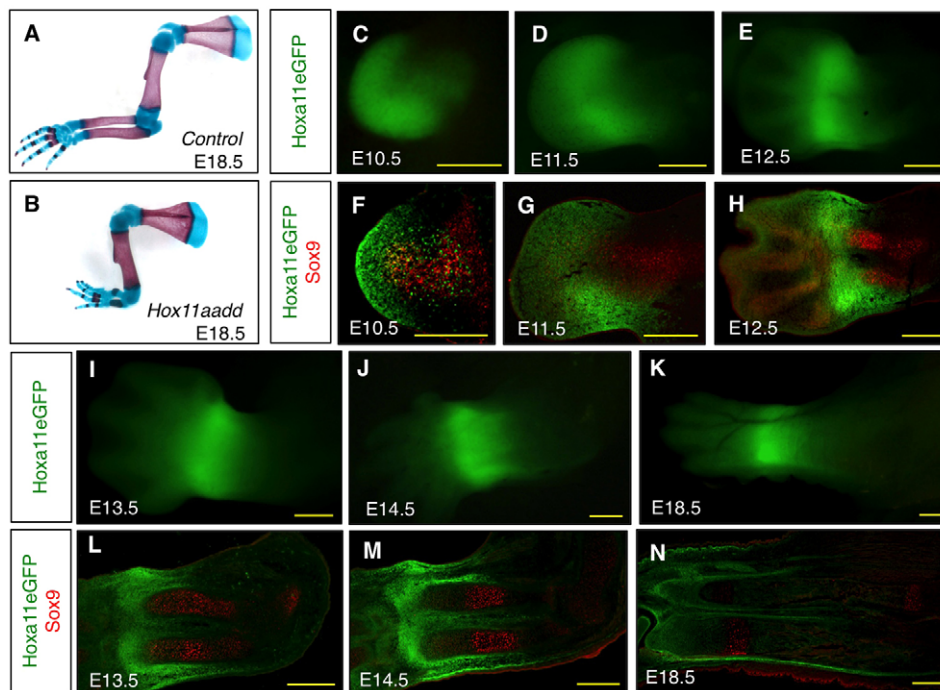

**Fig. 1. Forelimb zeugopod skeletal elements are mispatterned in *Hoxa11/d11* double mutants and *Hoxa11eGFP* expression is maintained in the zeugopod throughout forelimb development.**

(A,B) Alcian Blue- and Alizarin Red-stained skeletal preparations of E18.5 control (A) and *Hoxa11/d11* double mutant (B) mouse forelimbs. (C-E,I-K) Whole-mount view of *Hoxa11eGFP* heterozygous embryo forelimb at E10.5 (C), E11.5 (D), E12.5 (E), E13.5 (I), E14.5 (J), and E18.5 (K). (F-H,I,L-N) Transverse sections through *Hoxa11eGFP* heterozygous forelimb co-stained with an antibody for the pre-chondrogenic marker Sox9 (red) at E10.5 (F), E11.5 (G), E12.5 (H), E13.5 (L), E14.5 (M), E18.5 (N). The initially broad and scattered expression of *Hoxa11eGFP* (C,F) becomes localized by E11.5 and is largely excluded from cartilage condensations from the earliest stages. Scale bars: 300  $\mu$ m.

## RESULTS

### Expression of *Hox11* genes during zeugopod development

*Hox11* genes are crucial for the morphogenesis of the zeugopod skeletal elements. Loss of function of all three members of the *Hox11* paralogous group (*Hoxa11*, *Hoxc11* and *Hoxd11*) results in dramatic mispatterning of forelimb and hindlimb zeugopod (Wellik and Capecchi, 2003). Because *Hoxc11* is not expressed in the forelimb, inactivation of only two members of the *Hox11* paralogous group, *Hoxa11* and *Hoxd11*, is required to disrupt the formation of the forelimb zeugopod (Fig. 1A,B) (Boulet and Capecchi, 2004; Davis et al., 1995).

We examined the forelimb expression pattern of *Hoxa11* utilizing a previously described *Hoxa11eGFP* targeted knock-in allele, which closely recapitulates the reported mRNA expression patterns of *Hoxa11* (Haack and Gruss, 1993; Hsieh-Li et al., 1995; Nelson et al., 2008; Small and Potter, 1993). *Hoxa11* and *Hoxd11* display similar expression patterns during forelimb development and *Hoxd11* duplication can compensate for the loss of *Hoxa11* gene function in the zeugopod, further demonstrating that spatial, temporal and functional aspects of *Hoxa11* and *Hoxd11* activity correspond closely in this aspect of limb patterning (Boulet and Capecchi, 2002; Hostikka and Capecchi, 1998). At embryonic day (E) 10.5, whole-mount analysis shows that *Hoxa11eGFP* expression is strongest at the distal end of the limb bud with expression extending into the central limb mesenchyme (Fig. 1C). *Hoxa11eGFP* fluorescence remains relatively ubiquitous in the distal limb bud at E11.5, although a more intense band of expression can be observed in the developing distal zeugopod region (Fig. 1D). As development proceeds, *Hoxa11eGFP* expression becomes strongest in the zeugopod and is reduced in the autopod (Fig. 1E,I-K).

Examination of longitudinal sections through E10.5 limb bud reveals that *Hoxa11eGFP* is expressed ubiquitously and uniformly throughout the distal limb bud mesenchyme (Fig. 1F). Additionally, a subset of cells proximal to the proliferative zone is GFP positive (Fig. 1F). Co-staining these sections with an antibody for the pre-chondrocyte marker Sox9 demonstrates that Sox9 and *Hoxa11eGFP*

expression are largely exclusive. Only a few cells at the distal end of the Sox9 expression domain appear to co-express *Hoxa11eGFP*. Most *Hoxa11eGFP*-positive cells at this stage are interspersed with the Sox9-expressing cells but are non-overlapping (Fig. 1F). *Hoxa11eGFP* expression remains exclusive from the Sox9-expressing cells after condensation of pre-cartilage into the skeletal elements of the zeugopod (Fig. 1G,H).

By E12.5, the stage at which the two zeugopod skeletal elements are forming distinct anlage, *Hoxa11eGFP* expression is largely restricted to the distal zeugopod region. Within the next 24 hours of development, *Hoxa11eGFP* expression is observed surrounding the zeugopod elements (Fig. 1H,L). *Hoxa11eGFP* expression is maintained through the remaining stages of embryonic development, surrounding the radius and ulna with strongest expression distally in these elements (Fig. 1M,N).

### *Hoxa11eGFP* is expressed in the outer perichondrium, tendons and muscle connective tissue

The perichondrium/periosteum functions as a signaling center for the underlying chondrocytes (Colnot et al., 2004; Kronenberg, 2007). The periosteum is composed of two layers. The first is an outer layer composed of stromal fibroblasts, the roles of which are not fully understood, but it is known that they provide the immediate attachment site for tendons and ligaments. The second layer is the inner periosteal, osteoblast-containing layer that contributes directly to appositional growth (Bandyopadhyay et al., 2008; Pathi et al., 1999). Runx2 and osterix (*Osx*; also known as Sp7) are essential transcription factors expressed at early osteoblast differentiation stages in the inner periosteal layer (Komori et al., 1997; Nakashima et al., 2002; Otto et al., 1997). By E13.5, *Hoxa11eGFP* is expressed strongly in the cells of the outer periosteum of the zeugopod but is excluded from chondrocytes as well as the Runx2- and *Osx*-expressing inner periosteal/osteoblast layer (Fig. 2A,B). Close examination of *Osx* and *Hoxa11eGFP* shows that *Hoxa11* is expressed in the cells immediately adjacent to the Runx2/*Osx*-expressing inner periosteal layer (Fig. 2B'). *Hoxa11eGFP* is not co-

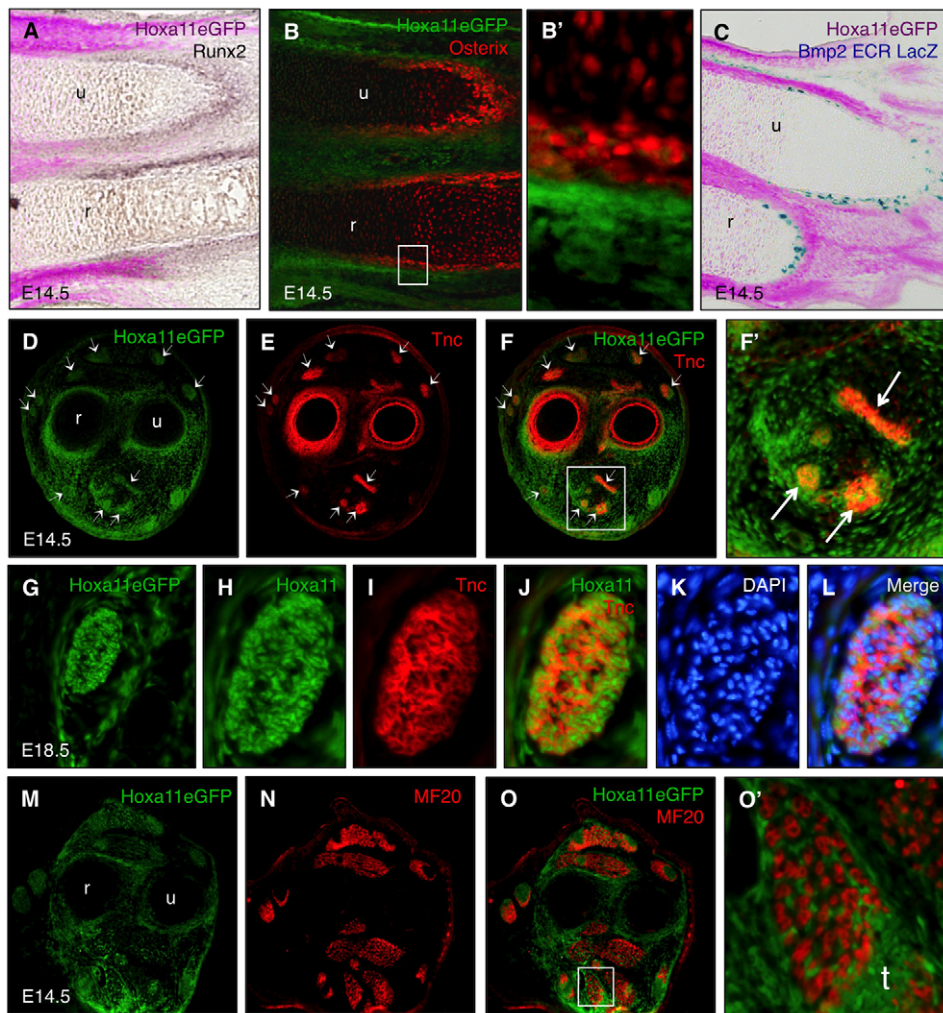

**Fig. 2. Hoxa11eGFP is expressed in the outer perichondrium, tendons and muscle connective tissue but excluded from chondrocytes, osteoblasts, muscle and endothelial cells.** (A-C) Longitudinal sections through E14.5 forelimbs of *Hoxa11eGFP* heterozygous embryos co-labeled for osteoblast markers by *in situ* hybridization for *Runx2* (brown; A), antibody staining for osterix (red; B,B'), or  $\beta$ -galactosidase staining for the *Bmp2* ECR *lacZ* reporter (blue; C) shows that *Hoxa11eGFP* is not expressed in osteoblasts but in the adjacent cells of the outer perichondrium. B' shows a higher magnification of the boxed region in B. GFP fluorescence was converted to purple in images A and C to allow color visualization. (D-O') Transverse sections along the proximodistal axis of the limb in the zeugopod of *Hoxa11eGFP* heterozygous embryos. (D-F') Co-staining with an antibody to the tendon marker *Tnc* shows that *Hox11* genes are expressed in all zeugopod tendons. Some tendons are marked by arrows. F' shows a higher magnification of the boxed region in F. (G-L) *Hoxa11eGFP* expression is observed in all cells of the tendon and surrounding cells of the tendon sheath through E18.5. (M-O') Antibody staining for the muscle marker MF20 demonstrates that *Hoxa11eGFP* is not expressed in muscle cells but in the cells closely associated with the muscle masses. r, radius; t, tendon; u, ulna.

expressed with *Runx2* or *osterix* at any developmental stage examined. Additionally, *Hoxa11eGFP* does not co-express with the osteoblast reporter *Bmp2* evolutionarily conserved region (ECR) *lacZ* (Chandler et al., 2007), confirming exclusion of expression from the inner periosteal, osteoblast population (Fig. 2C). These data show that *Hoxa11eGFP* is strongly expressed in a population of stromal cells immediately adjacent to the osteoblast layer in the outer periosteum.

To investigate further the expression of *Hoxa11eGFP* in the soft-tissue components of the musculoskeletal system, we examined transverse sections through the zeugopod. The extracellular matrix protein tenascin C (*Tnc*) marks anatomically distinct tendons and tendon primordia of the limb (Chiquet and Fambrough, 1984; Kardon, 1998). *Hoxa11eGFP* is co-expressed with *Tnc* in all tendons of the zeugopod (Fig. 2D-F'). Using DAPI, a nuclear stain, in conjunction with *Hoxa11eGFP* and the *Tnc* antibody, we demonstrate that all of the cells within the *Tnc*-positive tendon express *Hoxa11eGFP* (Fig. 2D-L).

Comparison of *Hoxa11eGFP* expression in the muscle cell population using antibodies against myosin to stain differentiated muscle cells reveals that *Hoxa11* is not expressed within the differentiated muscle cells but within the lateral plate-derived limb stromal cells closely associated with the myotubes (Fig. 2M-O'). *Hoxa11eGFP*-positive cells are distributed throughout and surround each of the muscle masses of the zeugopod.

In addition to being excluded from differentiated muscle cells (Fig. 3A-C), co-staining with platelet endothelial cell adhesion molecule (PECAM) shows that *Hoxa11eGFP* is non-overlapping with the differentiated endothelial compartment of the limb as well (Fig. 3D-F). Co-staining with the muscle connective tissue marker *Tcf4* demonstrates that *Hoxa11eGFP* is expressed in the mesodermal fibroblasts dispersed throughout the muscle masses (Fig. 3G-I, arrows). The close association of *Hoxa11eGFP*-expressing cells with myotubes is apparent as early as E12.5 when the process of muscle splitting is initiated in the limb (supplementary material Fig. S1). Thus, *Hox11* genes are specifically expressed in the connective tissue population of the muscle throughout patterning but not in the muscle cells or the associated endothelial compartment.

#### Loss of *Hox11* genes leads to defects in muscle patterning of the zeugopod

The expression of *Hox11* genes in muscle connective tissue during limb development led us to examine whether there is a role for *Hox11* genes in muscle patterning. Section analysis through control and *Hoxa11/d11* double-mutant forelimbs stained with an antibody for differentiated muscle (*My32*) show that the stylopod muscle pattern of these animals are indistinguishable from controls (Fig. 4A,C). By contrast, the zeugopod muscle pattern in *Hox11* double mutants is severely perturbed compared with controls (Fig. 4B,D). Three-dimensional reconstructions of serial sections of *My32*-

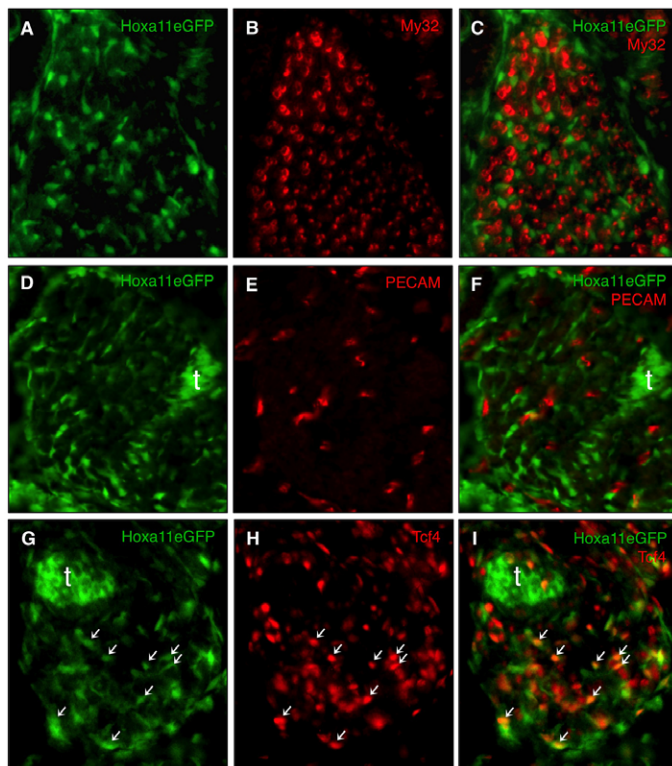

**Fig. 3. Hoxa11eGFP is expressed in muscle connective tissue but not endothelial cells or muscle cells.** (A-I) Transverse sections through forelimb zeugopod of *Hoxa11eGFP* heterozygous embryos at E14.5. (A-C) Antibody staining with the muscle marker My32 shows that Hoxa11eGFP is not expressed in muscle cells. (D-F) Hoxa11eGFP is also excluded from the endothelial compartment marked with an antibody for PECAM. (G-I) Hoxa11eGFP displays significant co-expression with antibody staining to the muscle connective tissue marker Tcf4. Some Hoxa11eGFP, Tcf4 double-positive cells are marked by arrows. t, tendon.

stained *Hox11* double-mutant forelimbs at E14.5 allows visualization of the extent of muscle mispatterning in the zeugopod and putative identification of the remaining muscle masses based on their position within the limb as well as their origin and insertion sites. Several dorsal muscle groups in the mutants cannot be distinguished but appear as undivided muscle masses. These include the extensors carpi radialis brevis and longus and the extensors digitorum communis, digitorum lateralis and carpi ulnaris (Fig. 4D,G, numbers 10-14). Distal muscle groups of the dorsal zeugopod, such as the extensors pollicis and indicis proprius are absent in *Hox11* mutants (Fig. 4E,G, numbers 15, 25). Additionally, many ventral muscle groups, including the flexor digitorum superficialis 2, flexor digitorum profundus and pronator quadratus are missing in *Hox11* double-mutant forelimbs (Fig. 4D,H, numbers 19, 20, 24). The skeletal-tendon connections for each of the absent muscle groups originate, at least in part, from the radius or ulna. Most of the remaining muscle groups in the *Hoxa11/Hoxd11* mutant have origin and insertion sites in the humerus and autopod, but reconstructions of sections through mutant forelimb musculature demonstrate that these muscle groups in mutants are dysmorphic compared with controls (Fig. 4E-H).

Loss of *Hox11* paralogous gene function similarly effects muscle patterning within the zeugopod region of the hindlimb (supplementary material Fig. S2). Several ventral muscle masses are absent from *Hox11* triple-mutant hindlimbs whereas dorsal muscles

appear as undivided muscle masses (supplementary material Fig. S2B).

The muscle connective tissue of *Hox11* double mutants maintains expression of Tcf4 (supplementary material Fig. S3). The pattern of Tcf4 expression in *Hox11* mutants is indistinguishable from controls at E13.5 as shown by whole-mount *in situ* hybridization (ISH) (supplementary material Fig. S3A,B). Immunohistochemistry (IHC) at E14.5 shows minor alterations in Tcf4 pattern by this stage; however, the level of Tcf4 expression in the zeugopod control and *Hox11* double-mutant embryos is indistinguishable (supplementary material Fig. S3C,D).

### Loss of *Hox11* genes leads to disrupted tendon structure and pattern

*Hoxa11/d11* mutant tendon progenitors arise normally and their initial pattern, as detected by *in situ* hybridization for scleraxis (*Scx*), is indistinguishable from controls at E13.5 (Fig. 5A,F). However, by E14.5, severe defects in the tendon structure and pattern are apparent in *Hox11* mutants compared with controls (Fig. 5B-E,G-J). Staining for Tnc, a component of the tendon extracellular matrix, shows that the pattern of tendons in *Hoxa11/d11* mutants at this stage corresponds to the altered muscle pattern in these animals. In instances in which muscles are absent, no associated tendon is observed by E14.5 (Fig. 5G-I). In the dorsal zeugopod of *Hoxa11/d11* double mutants, the three tendons associated with the extensors digitorum communis, digitorum lateralis and carpi ulnaris, which are an undivided single muscle mass in mutant embryos, are patterned correctly at their distal ends and make appropriate insertions in the autopod (Fig. 5I). However, these tendons are mispatterned at the myotendinous junction in the zeugopod region (Fig. 5G-I, numbers 12-14). The only defects observed in tendinous insertions in the stylopod or autopod are those from muscles that are absent from the zeugopod of the *Hox11* mutant. In addition to disrupted patterning, the tendons formed in *Hox11* mutants lack proper organization and do not fasciculate as observed for controls (Fig. 5E,J).

Remaining *Hox11* mutant tendons are smaller than controls at E18.5 and histological examination shows that it is difficult to discern the tendon sheath in *Hox11* mutant tendons (Fig. 6A-B'). The tendon sheath is an elastic sleeve of connective tissue that surrounds the tendon and functions to provide lubrication to minimize friction between the tendon and surrounding tissues. Tubulin polymerization-promoting protein family member 3 (*Tppp3*) has been identified as a molecular marker of the cells of the tendon sheath (Staverosky et al., 2009). Hyaluronic acid (HA) and lubricin (also known as proteoglycan 4) are main components of the synovial fluid that surround the tendon and are important for normal tendon function (Kohrs et al., 2011). Marker analysis with *Tppp3* shows that tendon sheath cells are present in the proper location surrounding the tendons in *Hox11* double mutants (Fig. 6C,D). However, HA and lubricin are dramatically reduced or absent from zeugopod tendon synovium with loss of *Hox11* genes (Fig. 6E-H).

Tendons are composed of closely packed parallel collagen fiber bundles that are essential for providing the tensile strength required for transmitting loads (Wang et al., 2012). In the zeugopod tendons of *Hox11* double-mutant embryos at E18.5, Sirius Red staining for collagen is reduced compared with controls, consistent with either a reduction in collagen and/or an alteration in collagen organization (Fig. 7A,B) (Puchtler et al., 1973; Sweat et al., 1964). To examine this further, we performed transmission electron microscopy (TEM) on transverse sections through zeugopod tendons of control and *Hox11*

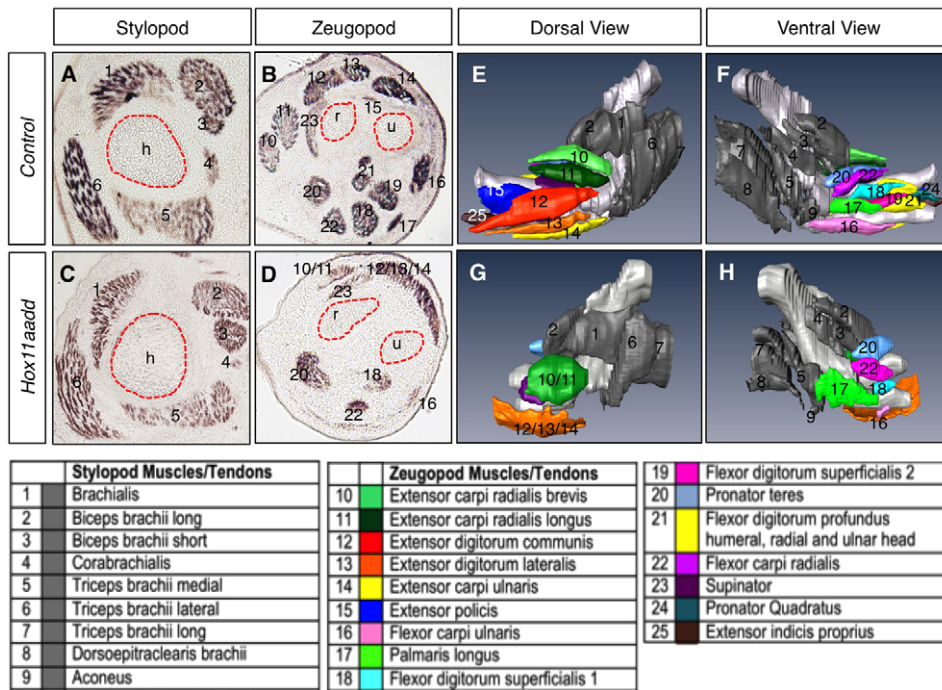

**Fig. 4. Forelimb zeugopod muscles are disrupted in *Hoxa11/d11* double mutants whereas stylopod muscles are unaffected.** (A-D) Transverse section through the stylopod of E14.5 control (A) and *Hox11* double-mutant forelimbs (C) stained for differentiated muscle (My32 antibody) shows no difference in muscle pattern in this region in the absence of *Hox11* genes. The zeugopod of the *Hox11* mutant (D) displays severe patterning defects compared with control (B). (E-H) 3D reconstruction of serial sections stained with My32 antibody using Amira software. Numbers denote specific muscles listed in the table below. Many dorsal muscle groups are merged (10/11, 12/13/14) or absent (15) and several ventral muscle groups are absent (17, 19, 21). h, humerus; r, radius; u, ulna.

mutants. Although *Hox11* mutant tendons are notably smaller, as observed histologically, no gross differences are observed in the amount of collagen (Fig. 7B,E; supplementary material Fig. S4). However, the organization of the collagen fibers is markedly disrupted. In control tendons, collagen fibers run uniformly perpendicular to the plane of section resulting in round cross-sections of even diameter (Fig. 7B). The collagen fibers in *Hox11* mutant tendons are disorganized and run in multiple directions, both perpendicular and parallel to the plane of section (Fig. 7E, red arrowheads mark misaligned fibers). Additionally, the synovial space surrounding the tendon can be clearly observed in controls (Fig. 7C), but this region is absent in *Hox11* mutant tendons (Fig. 7F). In mutants, the collagen and tendon fibroblasts that make up the body of

the tendon are observed directly adjacent to tendon sheath cells with no extracellular matrix deposition between these layers.

**Muscle and tendon patterning defects in *Hox11* mutants are independent of skeletal development**

In addition to the previously appreciated role for Hox genes in patterning the skeleton, we show here that muscle and tendon formation are also severely disrupted in the forelimb zeugopod of *Hoxa11/d11* mutant embryos. Furthermore, we show that *Hoxa11* eGFP expression can be observed in the tendon and muscle connective tissue from the earliest stages in addition to the perichondrium of the developing zeugopod skeleton. However, it is not possible to distinguish whether the defects in muscle and tendon

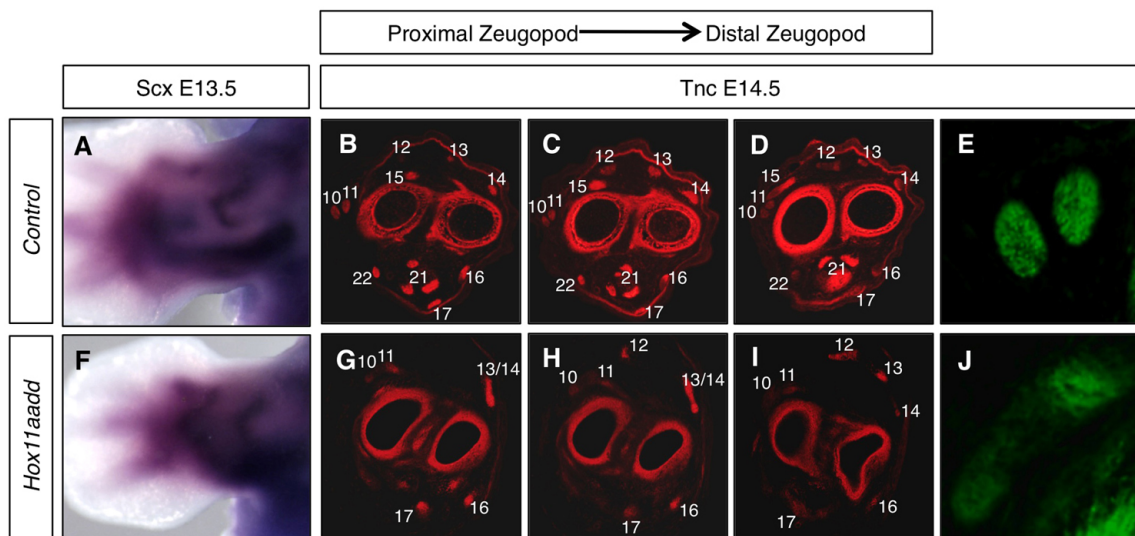

**Fig. 5. Tendon patterning is disrupted in the forelimb zeugopod of *Hox11* double mutants.** (A,F) Whole-mount *in situ* hybridization for the tendon marker scleraxis in control (A) and *Hoxa11/d11* double mutant (F) forelimbs at E13.5 shows that tendon progenitors are normally specified in *Hox11* mutants. (B-D,G-I) Transverse sections through the zeugopod of control (B-D) and *Hoxa11/d11* (G-I) forelimbs at E14.5 from proximal (left) to distal (right) stained with an antibody for Tnc to detect tendons. The pattern of tendons in *Hox11* mutants at this stage correlates with the altered muscle pattern in these animals. Numbers correspond to those shown in Fig. 4. (E,J) High magnification of Tnc-stained tendon in control (E) and *Hox11* double mutant (J) shows disorganization of remaining tendons.

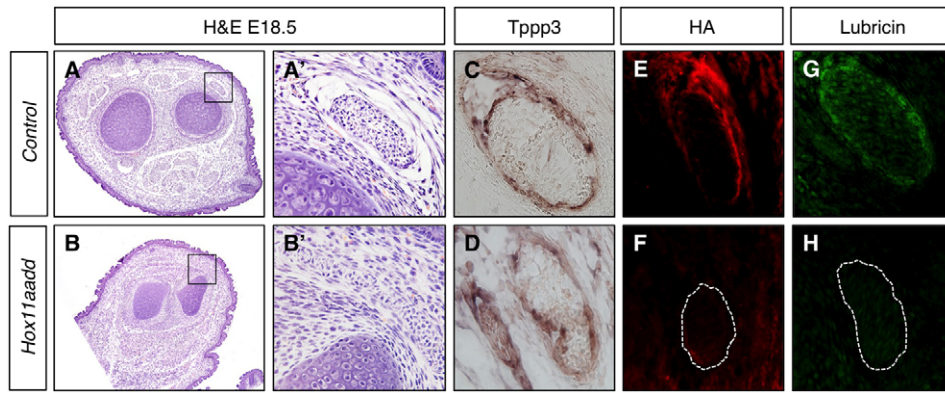

**Fig. 6. In the absence of *Hox11* genes, tendon structure is abnormal and tendon sheath extracellular matrix is not present.** (A-H) Transverse sections through the zygopod of control (A,A',C,E,G) and *Hoxa11/d11* mutant (B,B',D,F,H) forelimbs at E18.5. Hematoxylin and Eosin (H&E) staining (A-B) shows abnormal tendon histology in *Hox11* mutants. A' and B' show higher magnifications of the boxed regions in A and B, respectively. *In situ* hybridization for the tendon sheath marker *Tppp3* (C,D) demonstrates presence of tendon sheath cells. Staining for components of the tendon extracellular matrix hyaluronic acid (HA) (red; E,F) and lubricin (green; G,H) is dramatically reduced surrounding the tendon of *Hox11* mutants. In F and H, the tendon analogous to the one shown in E and G is outlined.

are primary or secondary to the defects in skeletal patterning. In *Hoxa11/d11* mutant embryos, the disruption of muscle, tendon and skeletal patterning becomes apparent at approximately the same developmental stages. To separate potential effects of the skeletal malformations from the function of *Hox11* genes in soft tissue patterning, we analyzed the muscle and tendon pattern in *Hox11* compound mutants in which three of four *Hox11* alleles are mutant. Because of the high degree of functional redundancy among members of a paralogous group in skeletal patterning, when a single allele of *Hoxa11* or *Hoxd11* remains functional, the skeletal elements of the zygopod develop relatively normally through newborn stages (Fig. 8A) (Boulet and Capecchi, 2004; Davis et al., 1995). Despite the relatively normal skeletal phenotype in *Hox11* compound mutants, significant disruption in muscle and tendon patterning is observed. Section analyses at E14.5 shows abnormal splitting of dorsal muscle groups in compound mutants. In *Hoxa11<sup>+/-</sup>;Hoxd11<sup>+/-</sup>* or *Hoxa11<sup>+/-</sup>;Hoxd11<sup>+/-</sup>* animals, the extensor digitorum comunis and lateralis fail to separate, but, unlike double mutants, the extensor carpi ulnaris is patterned normally (Fig. 8B-D, red arrowheads). Some compound mutant embryos also lack a separation between the extensor carpi radialis brevis and longus muscles (Fig. 8C, blue

arrowhead). Sections at E14.5 reveal more severe disruptions in the patterning of the ventral zygopod muscle groups in *Hox11* compound mutants as well, with all mutant ventral muscle groups appearing less organized (Fig. 8B-D). Tendon patterning is also disrupted in *Hox11* compound mutants. Immunohistochemistry for Tnc at E14.5 shows that *Hox11* compound mutant tendons are smaller than controls, and multiple tendons are missing from the ventral region by E14.5 (Fig. 8E-G). These results show the high degree of functional redundancy among members of the *Hox11* paralogous group. Removal of the final *Hoxa11* or *Hoxd11* allele results in much more severe disruption in muscle patterning with many additional muscle groups not formed (Fig. 4). By contrast, *Hox11* single mutant animals have very minor muscle defects (supplementary material Fig. S5). This analysis of *Hox11* compound mutants demonstrates that the defects in tendon and muscle patterning are redundant, albeit with increased sensitivity to dosage compared with the skeleton, but independent of the skeletal malformation phenotype.

## DISCUSSION

Much of our current understanding of the role of Hox genes in patterning has arisen from analyses of Hox loss-of-function skeletal

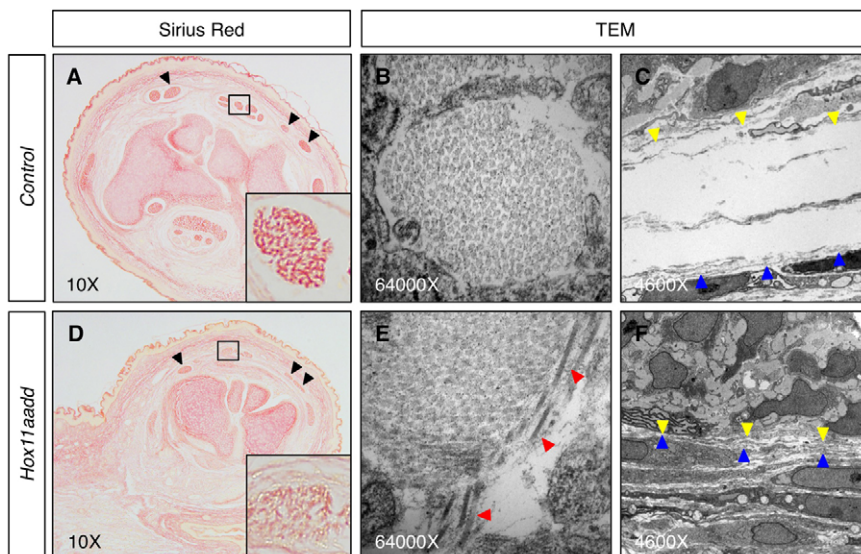

**Fig. 7. Tendons of *Hox11* mutants have disorganized collagen fibers.** (A,D) Sirius Red staining for collagen is reduced in *Hox11* double-mutant (D) zygopod tendons at E18.5 compared with control (A). Black arrowheads indicate three dorsal tendons. Insets show higher magnifications of boxed regions. (B,C,E,F) Transmission electron microscopy (TEM) images of collagen fibers in control (B) and *Hox11* mutant (E) forelimb zygopod tendon show disorganization of collagen in *Hox11* mutant. Red arrowheads point to collagen fibers running parallel to the plane of section, opposite to the normal orientation. Synovial fluid-filled space surrounding the tendon in control sections (C) is not observed around tendons in *Hox11* mutants (F). Yellow arrowheads indicate boundary of tendon fibroblasts. Blue arrowheads indicate boundary of tendon sheath cells.

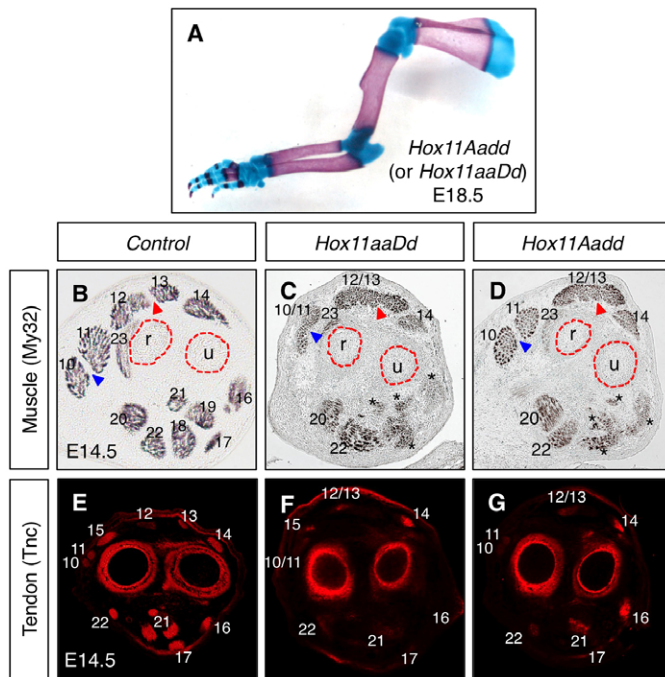

**Fig. 8. *Hox11* compound mutants display normal skeletal patterning, but muscle and tendon patterning is disrupted.** (A) Alcian Blue- and Alizarin Red-stained skeletal preparation of an E18.5 *Hox11* compound mutant (*Hoxa11<sup>+/-</sup>; Hoxd11<sup>+/-</sup>*) shows that the zeugopod skeletal elements are patterned normally when only one of the four *Hox11* alleles is wild type. (B-D) Immunohistochemistry for differentiated muscle (My32 antibody) in transverse sections through the zeugopod of control (B) and *Hox11* compound mutants (C,D). No separation is observed between the extensor digitorum communis and lateralis in compound mutants (red arrowheads) or between the extensor carpi radialis brevis and longus in *Hoxa11<sup>+/-</sup>; d11<sup>+/-</sup>* (blue arrowheads). Ventral muscle groups are severely disorganized in compound mutants (C,D). (E-G) Transverse sections through the distal zeugopod of control (E) and *Hox11* compound mutant (F,G) forelimbs at E14.5 stained with an antibody for Tnc to detect tendons shows disrupted tendon formation in *Hox11* compound mutants compared with control. Numbers correspond to those shown in Fig. 4. Muscles and tendons were not numbered in compound mutants because precise identifications could not be made; asterisks indicate structures that could not be assigned. r, radius; u, ulna.

phenotypes. Our results show that *Hoxa11*eGFP is expressed broadly throughout the limb bud at early stages and becomes restricted to the outer perichondrium, tendons, and muscle connective tissue fibroblasts of the zeugopod region as the skeletal anlage condense. Cells of the perichondrium secrete a variety of factors that profoundly influence chondrogenic differentiation (Karsenty, 2008; Kronenberg, 2007). These data suggest that Hox genes may exert their influence on skeletal development by regulating the expression of paracrine factors within the perichondrium and thereby directing the growth of the underlying cartilage.

With the loss of *Hoxa11* and *Hoxd11* function, tendon precursor cells appear to be specified normally much like zeugopod cartilage templates are specified appropriately; however, tendon patterning in the zeugopod region is severely disrupted. Tendons are specialized connective tissue cells that function to link muscle to bone and modulate forces during movement. Tendon primordia arise from within the limb mesenchyme in dorsal and ventral areas of the limb and subsequently align between the muscle masses and skeletal elements (Schweitzer et al., 2001). Later, tendon morphogenesis requires the presence of muscles, as tendon progenitors are

progressively lost in the absence of muscle invasion (Bonnin et al., 2005; Edom-Vovard et al., 2002; Kardon, 1998; Kiény and Chevallier, 1979). Tendon ablation experiments suggest that tendons contribute to muscle patterning by restricting muscle domains during development (Kardon, 1998). In *Hox11* mutants, tendon progenitors are observed, but they do not differentiate normally; they display poor fasciculation and some tendons in the zeugopod region fail to form. The high expression levels of *Hoxa11*eGFP in all cells of the tendons suggest a direct role for Hox genes in tendon morphogenesis.

Our results also demonstrate a severe disruption in zeugopod muscle patterning with loss of *Hox11* genes whereas other limb regions are unaffected. In contrast to the other components of the limb musculoskeletal system, such as the bone, tendons and muscle connective tissue that arise from cells within the lateral plate mesoderm, muscle cells migrate from the axial somites into the limb bud where they proliferate, aggregate and differentiate to form dorsal and ventral muscle masses. These masses subsequently segregate into individual, anatomically distinct muscle masses to achieve the final muscle pattern (Chevallier et al., 1977; Christ et al., 1977b; Ordahl and Le Douarin, 1992; Wachtler et al., 1981). Embryological manipulation experiments have shown that muscle cells do not possess intrinsic regulatory information for establishing pattern; rather, this information is transmitted through cells in the lateral plate mesoderm. In experiments in which somites from axial levels outside the normal limb region were transplanted to replace limb level somites, the muscle cells migrated into the limb and were able to give rise to normal limb muscle (Chevallier et al., 1977; Christ et al., 1977b). In addition, classic chick-quail graft experiments and single-cell lineage analysis of muscle precursor cells revealed that individual myogenic cells are not predetermined to form any particular anatomical muscle (Chevallier et al., 1977; Christ et al., 1977b; Christ et al., 1977a; Kardon et al., 2002). These studies indicate that cells within the limb mesenchyme provide the cues required for muscle pattern. Experiments with muscle-less limbs have shown that muscle connective tissue organizes into distinct morphological groups in the absence of muscle invasion, suggesting that muscle connective tissue regulates the patterning of migrating myoblasts (Chevallier and Kiény, 1982; Grim and Wachtler, 1991). The factors responsible for patterning the muscle are not well understood. The data we report here supports a role for Hox genes in regional muscle patterning through their expression in the connective tissue. The muscle masses that are absent in *Hox11* double-mutant limbs have tendon origin sites, at least in part, at the zeugopod skeletal elements. This is consistent with a role for *Hox11* genes in the connective tissue to establish the appropriate muscle-skeletal connections within the zeugopod region, eventually resulting in the production of distinct muscle groups.

The zeugopod skeleton of *Hox11* double mutants is dramatically shortened, raising the question of whether muscle and tendon defects observed in these animals might, in fact, be secondary to perturbations in skeletal morphology. To address this, we analyzed *Hox11* compound-mutant limbs in which a single *Hox11* allele remains functional, allowing the skeleton to develop relatively normally through embryonic stages. Muscle and tendon patterning is disrupted in these animals, demonstrating that these defects are not an indirect result of skeletal perturbation but represent an independent patterning role for Hox genes in the soft-tissue components of the musculoskeletal system. The significant disruption in muscle and tendon patterning observed in *Hox11* compound mutants demonstrates that muscles and tendons are more sensitive to loss of *Hox11* genes than are skeletal elements during

development. The causes for these differences in dosage sensitivity will be interesting to explore in future work.

Although Hox expression in early limb buds prior to the differentiation of mesoderm into specific tissue cell types is broad, this expression quickly becomes localized to the limb region where its patterning function is observed. Expression is largely confined at these stages to the connective tissues. This expression persists throughout development in the connective tissue cells. Previous studies of Hox expression and function within the limb have primarily focused on the early, broad expression of Hox genes in the limb mesenchyme and relied on whole-mount analyses of limb buds rather than more detailed examination of tissue-specific expression patterns. Our results suggest a possible continued role for Hox genes throughout limb development.

During development, muscle, tendon and bone must be tightly coordinated to produce a functional system. However, the formation of each of these tissues is often studied separately. Thus, significant knowledge on the mechanisms of differentiation of each of these individual tissues has been attained; however, much less is known regarding how these tissues are integrated. Our results demonstrate that Hox genes are crucial not only for patterning the skeleton but also for patterning muscle and tendon to produce a regionally integrated, functional musculoskeletal system. This study illustrates the essential role of Hox genes in patterning the vertebrate body plan and shifts the paradigm of Hox function in musculoskeletal development from one in which these genes are crucial factors for skeletal morphogenesis to one that recognizes their role in the patterning and integration of all musculoskeletal tissues.

## MATERIALS AND METHODS

### Animals

Male and female mice heterozygous for both the *Hoxa11* and *Hoxd11* null alleles were mated to generate compound mutant and double mutant embryos as previously described (Boulet and Capecchi, 2004). Embryos heterozygous for the *Hoxa11eGFP* allele were generated by traditional breeding strategies as previously described (Nelson et al., 2008). All animal experiments described in this article were reviewed and approved by the University of Michigan's Committee on Use and Care of Animals, Protocol #08787.

### In situ hybridization and immunohistochemistry

Whole-mount ISH was performed as previously described (Huppert et al., 2005; Wellik et al., 2002). For section ISH, embryos were collected in PBS and fixed overnight in 4% paraformaldehyde in PBS at 4°C. Embryos were then rinsed in PBS and immersed in 30% sucrose at 4°C overnight prior to embedding into OCT media. Section ISH was performed as previously described (Di Giacomo et al., 2006; Mendelsohn et al., 1999). Prior to ISH on sections of *Hoxa11eGFP* tissue, slides were rinsed in PBS and fluorescent images were taken on an Olympus BX-51 upright light microscope with an Olympus DP70 camera. *Runx2*, *Scx*, *Tcf4* and *Tppp3* *in situ* probes were previously described (Cho and Dressler, 1998; Murchison et al., 2007; Staverosky et al., 2009).

For IHC on sections, embryos were processed and sectioned as described above for section ISH. For whole-mount IHC, embryos were collected in PBS and the skin was removed from the limbs by careful dissection prior to fixation overnight in 4% paraformaldehyde in PBS at 4°C prior to transfer through a graded series of methanol. Immunohistochemical staining was performed using antibodies for Sox9 (1:500, Millipore, AB5535), tenascin C (1:400, Sigma, T3413), GFP (1:500, Invitrogen, A-11122), myosin [mouse monoclonals MF20 (1:50, Developmental Studies Hybridoma Bank) and My32 (alkaline phosphatase conjugated, 1:800, Sigma, A4335; unconjugated, 1:200, Sigma, M4276)], lubricin (1:200, Thermo Scientific, PA3-118) and PECAM (1:10, Developmental Studies Hybridoma Bank, 2H8-S). Antibody staining for Tcf4 (1:100, Cell Signaling, 2569 C48H11) was performed on flash-frozen tissue without detergent. To visualize hyaluronic acid, a biotinylated hyaluronic acid binding protein (HABP,

Calbiochem) was used as previously described (Calve et al., 2010).  $\beta$ -Galactosidase staining was performed as described (Mortlock et al., 2003).

### TEM

For TEM, embryos were collected at E18.5, the skin was removed and the zeugopod region of the forelimb was dissected. Dissected zeugopods were fixed overnight in Karnovsky's fixative and decalcified for 1 week with 7% EDTA. Tissue was then rinsed in with Sorensen's buffer and dehydrated in ascending concentrations of ethanol, treated with propylene oxide, and embedded in Epon epoxy resin. Semi-thin sections were stained with Toluidine Blue for tissue identification. Selected regions of interest were ultra-thin sectioned 70 nm in thickness and post stained with uranyl acetate and lead citrate. They were examined using a Philips CM100 electron microscope at 60 kV. Images were recorded digitally using a Hamamatsu ORCA-HR digital camera system operated using AMT software (Advanced Microscopy Techniques Corp.).

### Three-dimensional reconstruction of serial sections

Embryos were collected at E14.5 and processed for IHC as described above. Serial sections (20  $\mu$ m) were stained for myosin using the mouse monoclonal antibody My32. Serial section images were loaded into the program Amira 4.1 (Visage Imaging) and automatically aligned using the least-squares function of the Amira AlignSlices tool. Automatically aligned stacks were manually corrected if necessary. My32-stained muscle masses were selected using the LabelField tool and a 3D surface was generated from the selected fields.

### Acknowledgements

We thank the investigators who provided reagents for experiments reported here. The HABP and lubricin antibodies were provided by Dr Christopher L. Mendias. The *Tppp3* and *Scx* *in situ* probes were provided by Dr Ronen Schweitzer. The *Runx2* *in situ* probe was provided by Dr Renny T. Franceschi. We thank Dr Gabriel Kardon, Dr Ronen Schweitzer, Dr Chris Mendias, Dr Sarah Calve, Dr Steven M. Hrycaj and Danielle R. Rux for their technical comments and suggestions. The myosin and PECAM monoclonal antibodies developed by D. A. Fischman and S. Bogen were obtained from the Developmental Studies Hybridoma Bank developed under the auspices of the NICHD and maintained by The University of Iowa.

### Competing interests

The authors declare no competing financial interests.

### Author contributions

I.T.S., A.J.S. and C.A.Q. performed the experiments; D.P.M. provided reagents critical for the analysis in Figure 2; and I.T.S. and D.M.W. wrote the manuscript.

### Funding

This study was supported in part by grants from the National Institutes of Health (NIH) [AR061402 and AR057018 to D.W.; HD047880 to D.P.M.]; by an NIH Cellular and Molecular Biology Training Grant [T32-GM007315 to I.S.]; and by a Michigan NIH PREP Program Training Grant [F033036 to C.Q.]. Deposited in PMC for release after 12 months.

### Supplementary material

Supplementary material available online at <http://dev.biologists.org/lookup/suppl/doi:10.1242/dev.096693/-/DC1>

### References

- Bandyopadhyay, A., Kubilus, J. K., Crochiere, M. L., Linsenmayer, T. F. and Tabin, C. J. (2008). Identification of unique molecular subdomains in the perichondrium and periosteum and their role in regulating gene expression in the underlying chondrocytes. *Dev. Biol.* **321**, 162-174.
- Bonnin, M.-A., Laclef, C., Blaise, R., Eloy-Trinquet, S., Relaix, F., Maire, P. and Duprez, D. (2005). Six1 is not involved in limb tendon development, but is expressed in limb connective tissue under Shh regulation. *Mech. Dev.* **122**, 573-585.
- Boulet, A. M. and Capecchi, M. R. (2002). Duplication of the *Hoxd11* gene causes alterations in the axial and appendicular skeleton of the mouse. *Dev. Biol.* **249**, 96-107.
- Boulet, A. M. and Capecchi, M. R. (2004). Multiple roles of *Hoxa11* and *Hoxd11* in the formation of the mammalian forelimb zeugopod. *Development* **131**, 299-309.
- Buckingham, M., Bajard, L., Chang, T., Daubas, P., Hadchouel, J., Meilhac, S., Montarras, D., Rocancourt, D. and Relaix, F. (2003). The formation of skeletal muscle: from somite to limb. *J. Anat.* **202**, 59-68.
- Calve, S., Odelberg, S. J. and Simon, H.-G. (2010). A transitional extracellular matrix instructs cell behavior during muscle regeneration. *Dev. Biol.* **344**, 259-271.



- Chandler, R. L., Chandler, K. J., McFarland, K. A. and Mortlock, D. P. (2007). Bmp2 transcription in osteoblast progenitors is regulated by a distant 3' enhancer located 156.3 kilobases from the promoter. *Mol. Cell Biol.* **27**, 2934-2951.
- Chevallier, A. and Kieny, M. (1982). On the role of the connective tissue in the patterning of the chick limb musculature. *Wilhelm Roux's Archives* **191**, 277-280.
- Chevallier, A., Kieny, M. and Mauger, A. (1977). Limb-somite relationship: origin of the limb musculature. *J. Embryol. Exp. Morphol.* **41**, 245-258.
- Chiquet, M. and Fambrough, D. M. (1984). Chick myotendinous antigen. I. A monoclonal antibody as a marker for tendon and muscle morphogenesis. *J. Cell Biol.* **98**, 1926-1936.
- Cho, E. A. and Dressler, G. R. (1998). TCF-4 binds beta-catenin and is expressed in distinct regions of the embryonic brain and limbs. *Mech. Dev.* **77**, 9-18.
- Christ, B., Jacob, H. J. and Jacob, M. (1977a). Experimental findings on muscle development in the limbs of the chick embryo. *Verh. Anat. Ges.* **71**, 1231-1237.
- Christ, B., Jacob, H. J. and Jacob, M. (1977b). Experimental analysis of the origin of the wing musculature in avian embryos. *Anat. Embryol. (Berl.)* **150**, 171-186.
- Colnot, C., Lu, C., Hu, D. and Helms, J. A. (2004). Distinguishing the contributions of the perichondrium, cartilage, and vascular endothelium to skeletal development. *Dev. Biol.* **269**, 55-69.
- Davis, A. P., Witte, D. P., Hsieh-Li, H. M., Potter, S. S. and Capecchi, M. R. (1995). Absence of radius and ulna in mice lacking *hoxa-11* and *hoxd-11*. *Nature* **375**, 791-795.
- Di Giacomo, G., Koss, M., Capellini, T. D., Brendolan, A., Pöpperl, H. and Selleri, L. (2006). Spatio-temporal expression of Pbx3 during mouse organogenesis. *Gene Expr. Patterns* **6**, 747-757.
- Edom-Vovard, F., Schuler, B., Bonnin, M.-A., Teillet, M.-A. and Duprez, D. (2002). Fgf4 positively regulates scleraxis and tenascin expression in chick limb tendons. *Dev. Biol.* **247**, 351-366.
- Fromental-Ramain, C., Warot, X., Lakkaraju, S., Favier, B., Haack, H., Birling, C., Dierich, A., Dollé, P. and Chambon, P. (1996a). Specific and redundant functions of the paralogous *Hoxa-9* and *Hoxd-9* genes in forelimb and axial skeleton patterning. *Development* **122**, 461-472.
- Fromental-Ramain, C., Warot, X., Messadecq, N., LeMeur, M., Dollé, P. and Chambon, P. (1996b). *Hoxa-13* and *Hoxd-13* play a crucial role in the patterning of the limb autopod. *Development* **122**, 2997-3011.
- Grim, M. and Wachtler, F. (1991). Muscle morphogenesis in the absence of myogenic cells. *Anat. Embryol. (Berl.)* **183**, 67-70.
- Haack, H. and Gruss, P. (1993). The establishment of murine *Hox-1* expression domains during patterning of the limb. *Dev. Biol.* **157**, 410-422.
- Hostikka, S. L. and Capecchi, M. R. (1998). The mouse *Hoxc11* gene: genomic structure and expression pattern. *Mech. Dev.* **70**, 133-145.
- Hsieh-Li, H. M., Witte, D. P., Weinstein, M., Branford, W., Li, H., Small, K. and Potter, S. S. (1995). *Hoxa 11* structure, extensive antisense transcription, and function in male and female fertility. *Development* **121**, 1373-1385.
- Huppert, S. S., Ilagan, M. X. G., De Strooper, B. and Kopan, R. (2005). Analysis of Notch function in presomitic mesoderm suggests a gamma-secretase-independent role for presenilins in somite differentiation. *Dev. Cell* **8**, 677-688.
- Izpisua-Belmonte, J. C. and Duboule, D. (1992). Homeobox genes and pattern formation in the vertebrate limb. *Dev. Biol.* **152**, 26-36.
- Kardon, G. (1998). Muscle and tendon morphogenesis in the avian hind limb. *Development* **125**, 4019-4032.
- Kardon, G., Campbell, J. K. and Tabin, C. J. (2002). Local extrinsic signals determine muscle and endothelial cell fate and patterning in the vertebrate limb. *Dev. Cell* **3**, 533-545.
- Karsenty, G. (2008). Transcriptional control of skeletogenesis. *Annu. Rev. Genomics Hum. Genet.* **9**, 183-196.
- Karsenty, G., Kronenberg, H. M. and Settembre, C. (2009). Genetic control of bone formation. *Annu. Rev. Cell Dev. Biol.* **25**, 629-648.
- Kieny, M. and Chevallier, A. (1979). Autonomy of tendon development in the embryonic chick wing. *J. Embryol. Exp. Morphol.* **49**, 153-165.
- Kohrs, R. T., Zhao, C., Sun, Y.-L., Jay, G. D., Zhang, L., Warman, M. L., An, K.-N. and Amadio, P. C. (2011). Tendon fascicle gliding in wild type, heterozygous, and lubricin knockout mice. *J. Orthop. Res.* **29**, 384-389.
- Komori, T., Yagi, H., Nomura, S. and Yamaguchi, A. (1997). Targeted disruption of *cbfa1* results in a complete lack of bone formation owing to maturational arrest of osteoblasts. *Cell* **89**, 755-764.
- Kronenberg, H. M. (2007). The role of the perichondrium in fetal bone development. *Ann. New York Acad. Sci.* **1116**, 59-64.
- Mallo, M., Vinagre, T. and Carapuço, M. (2009). The road to the vertebral formula. *Int. J. Dev. Biol.* **53**, 1469-1481.
- Mallo, M., Wellik, D. M. and Deschamps, J. (2010). Hox genes and regional patterning of the vertebrate body plan. *Dev. Biol.* **344**, 7-15.
- Mendelsohn, C., Baturina, E., Fung, S., Gilbert, T. and Dodd, J. (1999). Stromal cells mediate retinoid-dependent functions essential for renal development. *Development* **126**, 1139-1148.
- Mortlock, D. P., Guenther, C. and Kingsley, D. M. (2003). A general approach for identifying distant regulatory elements applied to the *Gdf6* gene. *Genome Res.* **13**, 2069-2081.
- Murchison, N. D., Price, B. A., Conner, D. A., Keene, D. R., Olson, E. N., Tabin, C. J. and Schweitzer, R. (2007). Regulation of tendon differentiation by scleraxis distinguishes force-transmitting tendons from muscle-anchoring tendons. *Development* **134**, 2697-2708.
- Nakashima, K., Zhou, X., Kunkel, G., Zhang, Z., Deng, J. M., Behringer, R. R. and de Crombrugge, B. (2002). The novel zinc finger-containing transcription factor *osterix* is required for osteoblast differentiation and bone formation. *Cell* **108**, 17-29.
- Nelson, L. T., Rakshit, S., Sun, H. and Wellik, D. M. (2008). Generation and expression of a *Hoxa11:eGFP* targeted allele in mice. *Dev. Dyn.* **237**, 3410-3416.
- Ordahl, C. P. and Le Douarin, N. M. (1992). Two myogenic lineages within the developing somite. *Development* **114**, 339-353.
- Otto, F., Thornell, A. P., Crompton, T., Denzel, A., Gilmour, K. C., Rosewell, I. R., Stamp, G. W. H., Beddington, R. S. P., Mundlos, S., Olsen, B. R. et al. (1997). *Cbfa1*, a candidate gene for cleidocranial dysplasia syndrome, is essential for osteoblast differentiation and bone development. *Cell* **89**, 765-771.
- Pathi, S., Rutenberg, J. B., Johnson, R. L. and Vortkamp, A. (1999). Interaction of *Ihh* and *BMP/Noggin* signaling during cartilage differentiation. *Dev. Biol.* **209**, 239-253.
- Puchtler, H., Waldrop, F. S. and Valentine, L. S. (1973). Polarization microscopic studies of connective tissue stained with picric-sirius red FBA. *Beitr. Pathol.* **150**, 174-187.
- Schweitzer, R., Chung, J. H., Murtaugh, L. C., Brent, A. E., Rosen, V., Olson, E. N., Lassar, A. and Tabin, C. J. (2001). Analysis of the tendon cell fate using *Scleraxis*, a specific marker for tendons and ligaments. *Development* **128**, 3855-3866.
- Small, K. M. and Potter, S. S. (1993). Homeotic transformations and limb defects in *Hox A11* mutant mice. *Genes Dev.* **7**, 2318-2328.
- Stavrosky, J. A., Pryce, B. A., Watson, S. S. and Schweitzer, R. (2009). Tubulin polymerization-promoting protein family member 3, *Tppp3*, is a specific marker of the differentiating tendon sheath and synovial joints. *Dev. Dyn.* **238**, 685-692.
- Sweat, F., Puchtler, H. and Rosenthal, S. I. (1964). Sirius red F3BA as a stain for connective tissue. *Arch. Pathol.* **78**, 69-72.
- Tozer, S. and Duprez, D. (2005). Tendon and ligament: development, repair and disease. *Birth Defects Res. C Embryo Today* **75**, 226-236.
- Wachtler, F., Christ, B. and Jacob, H. J. (1981). On the determination of mesodermal tissues in the avian embryonic wing bud. *Anat. Embryol. (Berl.)* **161**, 283-289.
- Wang, J. H.-C., Guo, Q. and Li, B. (2012). Tendon biomechanics and mechanobiology – a minireview of basic concepts and recent advancements. *J. Hand Ther.* **25**, 133-40; quiz 141.
- Wellik, D. M. (2007). Hox patterning of the vertebrate axial skeleton. *Dev. Dyn.* **236**, 2454-2463.
- Wellik, D. M. and Capecchi, M. R. (2003). *Hox10* and *Hox11* genes are required to globally pattern the mammalian skeleton. *Science* **301**, 363-367.
- Wellik, D. M., Hawkes, P. J. and Capecchi, M. R. (2002). *Hox11* paralogous genes are essential for metanephric kidney induction. *Genes Dev.* **16**, 1423-1432.
- Zakany, J. and Duboule, D. (2007). The role of Hox genes during vertebrate limb development. *Curr. Opin. Genet. Dev.* **17**, 359-366.
